# Supplementary material for: Sequentially fermentation of traditional Chinese medicine by Pichia kudriavzevii and bifidobacteria for Skin Care Function
Source: Research Square preprint supplement (doi:10.21203/rs.3.rs-1760332/v1), 2022-06-23
Supplement: Supplementary file 2 [file f885ebcdfa3284ab100385b8.docx]

Supplementary table 2 Active Peptides Detected in Skin Lotions

|  | Annotated Sequence | # Proteins | # PSMs | Master Protein Accessions | Theo. MH+ [Da] | Marked as | Top Apex RT [min] |
| --- | --- | --- | --- | --- | --- | --- | --- |
| 1 | [S].ILLLILIL.[I] | 1 | 2 | Q6DNA2 | 923.69035 | Pichia | 50.81 |
| 2 | [S].TGGGASL.[E] | 5 | 1 | B3DRV9 | 562.28312 | Bifidobaterium;Pichia | 17.58 |
| 3 | [D].KNIITNQ.[N] | 1 | 2 | A3LNC4 | 833.42509 | Pichia | 13.63 |
| 4 | [K].AVNEVIAP.[K] | 2 | 3 | B7GTK2 | 812.45124 | Bifidobaterium | 48.71 |
| 5 | [S].RPQGPPPG.[Q] | 1 | 1 | A3LSY7 | 806.41553 | Pichia | 25.28 |
| 6 | [T].VGINGFGRIG.[R] | 2 | 1 | Q9UVC0 | 989.55269 | Pichia | 44.41 |
| 7 | [Y].KDQKVE.[Y] | 1 | 1 | A3LR68 | 747.38831 | Pichia | 3.37 |
| 8 | [T].EVIVAP.[DG] | 5 | 8 | Q8G6B1 | 627.3712 | Bifidobaterium | 45.01 |
| 9 | [L].GLPGAP.[K] | 1 | 3 | A3GGE9 | 511.28747 | Pichia | 24.56 |
| 10 | [F].SAGPGTL.[S] | 1 | 1 | A3GFA2 | 602.31442 | Pichia | 22.94 |
| 11 | [L].NLPLLP.[T] | 1 | 1 | A1A1F4 | 666.41849 | Bifidobaterium | 54.44 |
| 12 | [AQ].LPINLP.[D] | 3 | 1 |  | 666.41849 | Bifidobaterium | 55.69 |
| 13 | [N].PDLPLP.[T] | 2 | 4 | B7GS97 | 651.3712 | Bifidobaterium | 46.29 |
| 14 | [S].SGGIVNA.[Q] | 1 | 2 | A3LR41 | 617.32532 | Pichia | 25.06 |
| 15 | [Q].ISYITP.[H] | 1 | 1 | A3LZ54 | 693.38177 | Pichia | 39.25 |
| 16 | [L].LASGATITY.[S] | 1 | 2 | P48874 | 896.47237 | Pichia | 40.21 |
| 17 | [K].VVITAP.[S] | 2 | 2 | Q9UVC0 | 599.37629 | Pichia | 36.86 |
| 18 | [L].TLSLPK.[P] | 1 | 2 | Q9P8N0 | 658.4134 | Pichia | 25.86 |
| 19 | [S].GANLAP.[E] | 2 | 3 | Q6ZZF4 | 543.2773 | Pichia | 23 |
| 20 | [M].LGGTLA.[G] | 1 | 1 |  | 531.31369 | Bifidobaterium | 21.29 |
| 21 | [R].NKSVVP.[V] | 1 | 3 | A3GGT2 | 644.36137 | Pichia | 27.57 |
| 22 | [V].GITKDGK.[W] | 4 | 2 | B7GU04 | 718.40938 | Bifidobaterium | 15.72 |
| 23 | [P].GLGTLA.[L] | 1 | 1 | Q841V6 | 531.31369 | Bifidobaterium | 21.29 |
| 24 | [TL].VLVTGG.[AS] | 3 | 1 | E8MF10 | 545.32934 | Bifidobaterium | 18.52 |
| 25 | [L].AGGVTP.[D] | 1 | 2 | O13504 | 501.26674 | Pichia | 15.7 |
| 26 | [S].SLFNLP.[E] | 1 | 2 | A3GF47 | 691.36612 | Pichia | 57.88 |
| 27 | [Y].SFINIP.[Q] | 1 | 2 | Q37024 | 691.36612 | Pichia | 60.65 |
| 28 | [E].YALDIP.[Q] | 1 | 2 |  | 691.36612 | Bifidobaterium | 60.65 |
| 29 | [L].KADGVL.[A] | 1 | 3 | A1A2C3 | 602.3508 | Bifidobaterium | 41.36 |
| 30 | [V].GPVPVGG.[G] | 1 | 2 | Q8G7Y6 | 582.32459 | Bifidobaterium | 26.53 |
| 31 | [V].SALGGP.[D] | 1 | 1 | A3LR41 | 501.26674 | Pichia | 15.7 |
| 32 | [D].VPAGPV.[D] | 1 | 1 | Q8G5Q9 | 539.31877 | Bifidobaterium | 34.24 |
| 33 | [G].VLGTIAG.[D] | 4 | 2 | Q8G5F1 | 630.3821 | Bifidobaterium | 34.47 |
| 34 | [K].NLPAPGP.[D] | 1 | 2 | A3LT66 | 665.3617 | Pichia | 31.3 |
| 35 | [D].QPAQAGP.[E] | 1 | 3 | P12808 | 669.32023 | Pichia | 17.04 |
| 36 | [R].SGQPSAI.[N] | 1 | 2 | A3LW52 | 659.33588 | Pichia | 23.39 |
| 37 | [K].AELNIK.[N] | 1 | 1 | Q8G3I2 | 687.40357 | Bifidobaterium | 28.85 |
| 38 | [V].EALNLK.[Q] | 1 | 1 |  | 687.40357 | Pichia | 28.85 |
| 39 | [S].SVAPSP.[P] | 1 | 3 | Q9HG09 | 557.29295 | Pichia | 22.12 |
| 40 | [Y].ANKNIK.[M] | 1 | 1 |  | 687.4148 | Pichia | 28.85 |
| 41 | [S].GAGKNLK.[R] | 3 | 1 |  | 687.4148 | Bifidobaterium | 28.85 |
| 42 | [Q].LVNVIAP.[I] | 2 | 1 | Q841V6 | 725.4556 | Bifidobaterium | 51.46 |
| 43 | [P].ASGGPVTA.[T] | 1 | 2 | Q8G838 | 659.33588 | Bifidobaterium | 23.39 |
| 44 | [G].GGGLIP.[G] | 1 | 2 | Q9UVG5 | 513.30312 | Pichia | 37.45 |
| 45 | [A].GKQNLK.[N] | 1 | 1 |  | 687.4148 | Bifidobaterium | 28.85 |
| 46 | [S].AVVVVN.[A] | 1 | 3 | B7GTL2 | 601.35555 | Bifidobaterium | 30.67 |
| 47 | [S].SGGIVN.[A] | 1 | 1 | A3LR41 | 546.2882 | Pichia | 17.24 |
| 48 | [F].AVILTP.[T] | 1 | 1 | A3LWH3 | 613.39194 | Pichia | 49.09 |
| 49 | [V].VLSAVG.[D] | 1 | 1 | B8DVY5 | 545.32934 | Bifidobaterium | 32.65 |
| 50 | [A].VASVVIG.[G] | 1 | 1 |  | 644.39775 | Bifidobaterium | 40.53 |
| 51 | [D].GSVAGSIP.[L] | 1 | 1 | A3LYL7 | 687.36718 | Pichia | 36.32 |
| 52 | [A].GVAPSA.[P] | 1 | 1 | Q8G4D1 | 501.26674 | Bifidobaterium | 16.59 |
| 53 | [E].GITLLP.[N] | 1 | 1 |  | 613.39194 | Bifidobaterium | 49.09 |
| 54 | [K].IGTLLP.[N] | 1 | 1 |  | 613.39194 | Pichia | 49.09 |
| 55 | [R].TIPGFP.[K] | 1 | 2 | A1A1K5 | 631.34499 | Bifidobaterium | 49.21 |
| 56 | [Q].IVPLSP.[T] | 2 | 3 | C6AHX0 | 625.39194 | Bifidobaterium | 43.98 |
| 57 | [P].PAPVVQ.[N] | 1 | 1 | A3LYL7 | 611.3399 | Pichia | 25.06 |
| 58 | [P].LTAVLP.[V] | 1 | 1 |  | 613.39194 | Pichia | 49.09 |
| 59 | [Q].SSVAPSP.[P] | 1 | 1 | Q9HG09 | 644.32498 | Pichia | 23.9 |
| 60 | [P].VAGPAP.[VI] | 3 | 2 | B7GQH1 | 511.28747 | Bifidobaterium | 26.15 |
| 61 | [AG].LKNVVA.[LG] | 4 | 1 | Q6ZZF4 | 644.39775 | Bifidobaterium;Pichia | 40.53 |
| 62 | [R].ISAASALT.[H] | 1 | 2 | A3LN91 | 733.40905 | Pichia | 29.04 |
| 63 | [R].TAVPGHVQ.[Q] | 2 | 1 | Q92448 | 808.43118 | Pichia | 30.34 |
| 64 | [V].SANVLSP.[E] | 1 | 1 |  | 687.36718 | Bifidobaterium | 36.32 |
| 65 | [G].AASAGVI.[L] | 1 | 1 | Q9P864 | 588.33515 | Pichia | 34.72 |
| 66 | [A].VPNVPA.[G] | 1 | 1 | A3LTE2 | 596.34024 | Pichia | 27.11 |
| 67 | [-].MAGLPP.[L] | 1 | 1 | Q8G4R1 | 585.30649 | Bifidobaterium | 35.28 |
| 68 | [T].AASLAS.[K] | 1 | 1 | A3LU10 | 519.2773 | Pichia | 2.40 |
| 69 | [V].GLVGGN.[S] | 1 | 1 | A3GGS6 | 517.26165 | Pichia | 11.68 |
| 70 | [D].LTNQIP.[V] | 1 | 1 | A3M022 | 685.38792 | Pichia | 39.1 |
| 71 | [S].VNSSILT.[L] | 1 | 2 |  | 733.40905 | Pichia | 29.4 |
| 72 | [H].GNKGVI.[S] | 1 | 1 |  | 588.33515 | Bifidobaterium | 34.72 |
| 73 | [D].VSQPLTA.[E] | 2 | 1 | B7GQ70 | 715.39848 | Bifidobaterium | 26.72 |
| 74 | [C].SAVDKLT.[G] | 1 | 1 | A3LN91 | 733.40905 | Pichia | 29.4 |
| 75 | [T].GSGIVQG.[L] | 1 | 1 |  | 617.32532 | Pichia | 25.06 |
| 76 | [D].SNVPGP.[G] | 2 | 1 | Q8G5I3 | 571.27222 | Bifidobaterium | 12.43 |
| 77 | [V].SAGGSM.[L] | 1 | 1 | D4QFE7 | 509.20242 | Bifidobaterium | 4.34 |
| 78 | [L].TGVAVP.[L] | 1 | 1 | A0ZZS8 | 543.31369 | Bifidobaterium | 32.29 |
| 79 | [G].GKSDILT.[L] | 1 | 1 |  | 733.40905 | Pichia | 29.4 |
| 80 | [EK].TSALQLT.[T] | 2 | 1 |  | 733.40905 | Bifidobaterium | 29.4 |
| 81 | [S].NSGSAP.[I] | 1 | 1 | P32101 | 532.23617 | Pichia | 26.48 |
| 82 | [C].INGGGQIN.[P] | 1 | 1 | A3LYR2 | 772.39479 | Pichia | 18.06 |
| 83 | [A].GVGVGQ.[A] | 1 | 1 | A1A200 | 516.27764 | Bifidobaterium | 12.35 |
| 84 | [G].NTLGLAP.[G] | 1 | 1 |  | 685.38792 | Bifidobaterium | 39.1 |
| 85 | [A].LSGAVP.[P] | 1 | 1 |  | 543.31369 | Bifidobaterium | 32.04 |
| 86 | [L].LSQGLAP.[F] | 1 | 1 |  | 685.38792 | Pichia | 39.1 |
| 87 | [D].NSSGAP.[L] | 1 | 1 |  | 532.23617 | Pichia | 26.48 |
| 88 | [AL].AAAISA.[AG] | 4 | 2 | Q8G4Q4 | 503.28239 | Bifidobaterium | 4.44 |
| 89 | [A].AAALAS.[AN] | 2 | 1 |  | 503.28239 | Bifidobaterium | 4.44 |
| 90 | [Q].AAASIA.[L] | 1 | 1 |  | 503.28239 | Bifidobaterium | 4.44 |
| 91 | [N].AAAAIS.[A] | 3 | 1 | Q8G4Q4 | 503.28239 | Bifidobaterium | 4.68 |
| 92 | [T].SGNVFISVN.[D] | 1 | 1 | A1A0T4 | 936.47852 | Bifidobaterium | 40.16 |
| 93 | [T].AAAIGT.[E] | 1 | 1 |  | 503.28239 | Pichia | 4.92 |
| 94 | [A].PAATVN.[V] | 1 | 1 | Q8G3M4 | 573.28787 | Bifidobaterium | 4.43 |
| 95 | [A].AAAGIT.[Y] | 1 | 1 |  | 503.28239 | Bifidobaterium | 8.55 |
| 96 | [VI].AAAGTI.[V] | 2 | 1 |  | 503.28239 | Bifidobaterium | 10.54 |
| 97 | [H].QITSIE.[A] | 1 | 2 | A3LQU0 | 691.35086 | Pichia | 35.79 |
| 98 | [S].AVVVAP.[G] | 1 | 2 | A1A3A4 | 555.35007 | Bifidobaterium | 36.77 |
| 99 | [I].QAPQQPQ.[E] | 1 | 1 | A3LN91 | 797.37881 | Pichia | 14.73 |
